# Supplementary material for: Dental Practice Integration Into Primary Care: A Microsimulation of Financial Implications for Practices
Source: MDPI journal article supplement (doi:10.3390/ijerph17062154), 2020-03-24
Supplement: s1 [file s1]

# **Dental Practice Integration into Primary Care: A Microsimulation of Financial Implications for Practices**

## **Appendix**

Table A1. Utilization rates by procedure type and by insurance

Table A2. Costs by dental procedure types (private insurance)

Table A3. Reimbursed rates by insurance status

Table A4. Procedure codes offered by general dentist and MEPS dental practice category matching

Table A5. Sensitivity analysis results – different payer distributions

Figure A1. Payment source distribution by insurance status

Figure A2. Utilization rates by procedure and insurance types

**Table A1. Utilization rates by procedure type and by insurance****Privately insured population**

| Type           | Mean     | Lower    | Upper    |
|----------------|----------|----------|----------|
| d_exam         | 0.621811 | 0.005983 | 0.011727 |
| d_clean        | 0.631954 | 0.005987 | 0.011735 |
| d_xray         | 0.278718 | 0.004602 | 0.009019 |
| d_flour        | 0.161022 | 0.003537 | 0.006932 |
| d_seal         | 0.086595 | 0.000905 | 0.001773 |
| d_filling      | 0.068891 | 0.001788 | 0.003504 |
| d_crown        | 0.030781 | 0.001387 | 0.002719 |
| d_root         | 0.012865 | 0.00191  | 0.003744 |
| d_gumsurg      | 0.085884 | 0.000773 | 0.001516 |
| d_perio_recall | 0.086635 | 0.000677 | 0.001328 |
| d_extract      | 0.058335 | 0.001046 | 0.00205  |
| d_oralsurg     | 0.001174 | 0.000392 | 0.000768 |
| d_denture      | 0.001566 | 0.000657 | 0.001287 |
| d_repair       | 0.000786 | 0.000373 | 0.00073  |
| d_other        | 0.017256 | 0.000769 | 0.001507 |

**Publicly insured population**

| Type           | Mean     | Lower    | Upper    |
|----------------|----------|----------|----------|
| d_exam         | 0.575843 | 0.010008 | 0.019615 |
| d_clean        | 0.565468 | 0.009859 | 0.019324 |
| d_xray         | 0.266431 | 0.00722  | 0.01415  |
| d_flour        | 0.174528 | 0.004676 | 0.009164 |
| d_seal         | 0.167018 | 0.001966 | 0.003853 |
| d_filling      | 0.086353 | 0.002972 | 0.005826 |
| d_crown        | 0.02386  | 0.002022 | 0.003962 |
| d_root         | 0.007957 | 0.001992 | 0.003904 |
| d_gumsurg      | 0.063327 | 0.001044 | 0.002046 |
| d_perio_recall | 0.046878 | 0.000491 | 0.000963 |
| d_extract      | 0.14418  | 0.002903 | 0.00569  |
| d_oralsurg     | 0.001149 | 0.000723 | 0.001417 |
| d_denture      | 0.00552  | 0.0024   | 0.004704 |
| d_repair       | 0.001575 | 0.000901 | 0.001766 |
| d_other        | 0.013562 | 0.001106 | 0.002167 |

**Uninsured population**

| Type           | Mean     | Lower    | Upper    |
|----------------|----------|----------|----------|
| d_exam         | 0.53257  | 0.02567  | 0.050314 |
| d_clean        | 0.521235 | 0.024712 | 0.048435 |
| d_xray         | 0.265914 | 0.019289 | 0.037806 |
| d_flour        | 0.09359  | 0.009214 | 0.018059 |
| d_seal         | 0.11003  | 0.003058 | 0.005993 |
| d_filling      | 0.108129 | 0.011444 | 0.02243  |
| d_crown        | 0.03655  | 0.006812 | 0.013351 |
| d_root         | 0.032449 | 0.008703 | 0.017058 |
| d_gumsurg      | 0.066516 | 0.003261 | 0.006392 |
| d_perio_recall | 0.062916 | 0.001218 | 0.002387 |
| d_extract      | 0.216713 | 0.010164 | 0.019922 |
| d_oralsurg     | 0.001682 | 0.002438 | 0.004778 |
| d_denture      | 0.003531 | 0.003559 | 0.006975 |
| d_repair       | 0.001614 | 0.00213  | 0.004174 |
| d_other        | 0.02172  | 0.004563 | 0.008943 |

**Table A2. Costs by dental procedure types (private insurance)**

| Procedure type | Mean   | SD    |
|----------------|--------|-------|
| d_exam         | 42.48  | 14.8  |
| d_clean        | 68.38  | 8.6   |
| d_xray         | 32.37  | 7.3   |
| d_flour        | 18.52  | 5.4   |
| d_seal         | 30.68  | 14.0  |
| d_filling      | 138.95 | 31.3  |
| d_crown        | 440.34 | 82.1  |
| d_root         | 525.43 | 54.6  |
| d_gumsurg      | 150.96 | 41.9  |
| d_perio_recall | 80.22  | 14.9  |
| d_extract      | 139.77 | 44.7  |
| d_oralsurg     | 117.26 | 63.5  |
| d_denture      | 644.53 | 205.1 |
| d_repair       | 128.47 | 55.6  |
| d_other        | 81.78  | 61.1  |

**Table A3. Reimbursed rates (calculated as total expenditure / total charged)**

|                | private |       | public |       | uninsured |       |
|----------------|---------|-------|--------|-------|-----------|-------|
|                | mean    | se    | mean   | se    | mean      | se    |
| d_exam         | 0.888   | 0.004 | 0.701  | 0.007 | 0.828     | 0.044 |
| d_clean        | 0.892   | 0.005 | 0.706  | 0.007 | 0.886     | 0.018 |
| d_xray         | 0.890   | 0.005 | 0.703  | 0.007 | 0.876     | 0.021 |
| d_flour        | 0.896   | 0.009 | 0.612  | 0.006 | 0.819     | 0.051 |
| d_seal         | 0.920   | 0.016 | 0.604  | 0.011 | 0.741     | 0.104 |
| d_filling      | 0.888   | 0.006 | 0.692  | 0.010 | 0.876     | 0.035 |
| d_crown        | 0.891   | 0.011 | 0.817  | 0.018 | 0.811     | 0.071 |
| d_root         | 0.873   | 0.015 | 0.715  | 0.039 | 0.943     | 0.035 |
| d_gumsurg      | 0.930   | 0.017 | 0.838  | 0.046 | 0.662     | 0.150 |
| d_perio_recall | 0.934   | 0.022 | 0.550  | 0.123 | 0.952     | 0.035 |
| d_extract      | 0.895   | 0.010 | 0.693  | 0.011 | 0.789     | 0.128 |
| d_oralsurg     | 0.836   | 0.031 | 0.657  | 0.040 | 0.947     | 0.060 |
| d_denture      | 0.805   | 0.034 | 0.747  | 0.029 | 0.901     | 0.061 |
| d_repair       | 0.815   | 0.057 | 0.733  | 0.060 | 0.517     | 0.168 |
| d_other        | 0.860   | 0.021 | 0.734  | 0.042 | 0.788     | 0.085 |

**Table A4. Procedure codes offered by general dentist and MEPS dental practice category matching**

| <b>MEPS Category</b> | <b>Procedure code</b> | <b>Description of Service</b>                                                                |
|----------------------|-----------------------|----------------------------------------------------------------------------------------------|
| d_exam               | D0120                 | Periodic oral evaluation — established patient                                               |
| d_exam               | D0140                 | Limited oral evaluation - problem focused                                                    |
| d_exam               | D0145                 | Oral evaluation for a patient under three years of age and counseling with primary caregiver |
| d_exam               | D0150                 | Comprehensive oral evaluation — new established patient                                      |
| d_exam               | D0160                 | Detailed and extensive oral evaluation —problem focused, by report                           |
| d_exam               | D0180                 | Comprehensive periodontal evaluation —new or established patient                             |
| d_xray               | D0210                 | Intraoral - complete series of radiographic images                                           |
| d_xray               | D0220                 | Intraoral - periapical first radiographic image                                              |
| d_xray               | D0230                 | Intraoral - periapical each additional radiographic image                                    |
| d_xray               | D0272                 | Bitewings - two radiographic images                                                          |
| d_xray               | D0273                 | Bitewings - three radiographic images                                                        |
| d_xray               | D0274                 | Bitewings - four radiographic images                                                         |
| d_xray               | D0277                 | Vertical bitewings - 7 to 8 radiographic images                                              |
| d_clean              | D1110                 | Prophylaxis - adult                                                                          |
| d_clean              | D1120                 | Prophylaxis - child                                                                          |
| d_flour              | D1206                 | Topical application of fluoride varnish                                                      |
| d_flour              | D1208                 | Topical application of fluoride – excluding varnish                                          |
| d_seal               | D1351                 | Sealant - per tooth                                                                          |
| d_seal               | D1352                 | Preventive resin restoration in a moderate to high caries risk patient — permanent tooth     |
| d_filling            | D2140                 | Amalgam - one surface, primary or permanent                                                  |
| d_filling            | D2150                 | Amalgam - two surfaces, primary or permanent                                                 |
| d_filling            | D2160                 | Amalgam - three surfaces, primary or permanent                                               |
| d_filling            | D2161                 | Amalgam - four or more surfaces, primary or permanent                                        |
| d_filling            | D2330                 | Resin-based composite - one surface, anterior                                                |
| d_filling            | D2331                 | Resin-based composite - two surfaces, anterior                                               |
| d_filling            | D2332                 | Resin-based composite - three surfaces, anterior                                             |
| d_filling            | D2335                 | Resin-based composite - four or more surfaces or involving incisal angle (anterior)          |
| d_filling            | D2390                 | Resin-based composite crown, anterior                                                        |
| d_filling            | D2391                 | Resin-based composite - one surface, posterior                                               |
| d_filling            | D2392                 | Resin-based composite - two surfaces,posterior                                               |
| d_filling            | D2393                 | Resin-based composite - three surfaces, posterior                                            |
| d_filling            | D2394                 | Resin-based composite - four or more surfaces, posterior                                     |
| d_crown              | D2710                 | Crown - resin-based composite                                                                |
| d_crown              | D2720                 | Crown - resin with high noble metal                                                          |
| d_crown              | D2721                 | Crown - resin with predominantly base metal                                                  |
| d_crown              | D2722                 | Crown - resin with noble metal                                                               |
| d_crown              | D2740                 | Crown - porcelain/ceramic substrate                                                          |
| d_crown              | D2750                 | Crown - porcelain fused to high noble metal                                                  |
| d_crown              | D2751                 | Crown - porcelain fused to predominantly                                                     |
| d_crown              | D2752                 | Crown - porcelain fused to noble metal                                                       |
| d_crown              | D2780                 | Crown - ¾ cast high noble metal                                                              |
| d_crown              | D2783                 | Crown - ¾ porcelain/ceramic                                                                  |
| d_crown              | D2790                 | Crown - full cast high noble metal                                                           |

|                    |       |                                                                                                                                          |
|--------------------|-------|------------------------------------------------------------------------------------------------------------------------------------------|
| d_crown            | D2794 | Crown - titanium                                                                                                                         |
| d_crown            | D2910 | Re-cement inlay                                                                                                                          |
| d_crown            | D2920 | Re-cement or re-bond crown                                                                                                               |
| d_crown            | D2929 | Prefabricated porcelain/ceramic crown - primary tooth                                                                                    |
| d_crown            | D2930 | Prefabricated stainless steel crown - primary tooth                                                                                      |
| d_crown            | D2931 | Prefabricated stainless steel crown - permanent tooth                                                                                    |
| d_crown            | D2940 | Protective restoration                                                                                                                   |
| d_crown            | D2950 | Core buildup, including any pins when required                                                                                           |
| d_crown            | D2951 | Pin retention - per tooth                                                                                                                |
| d_crown            | D2952 | Post and core in addition to crown, indirectly fabricated                                                                                |
| d_crown            | D2954 | Prefabricated post and core in addition to crown                                                                                         |
| d_crown            | D2961 | Labial veneer (resin laminate) - laboratory                                                                                              |
| d_crown            | D2962 | Labial veneer (porcelain laminate) - laboratory                                                                                          |
| d_crown            | D2980 | Crown repair necessitated by restorative material failure                                                                                |
| d_root             | D3110 | Pulp cap - direct (excluding final restoration)                                                                                          |
| d_root             | D3120 | Pulp cap - indirect (excluding final restoration)                                                                                        |
| d_root             | D3220 | Therapeutic pulpotomy (excluding final restoration)...                                                                                   |
| d_root             | D3221 | Pulpal debridement, primary and permanent teeth                                                                                          |
| d_root             | D3230 | Pulpal therapy (resorbable filling) - anterior, primary tooth (excluding final restoration)                                              |
| d_root             | D3240 | Pulpal therapy (resorbable filling) - posterior, primary tooth (excluding final restoration)                                             |
| d_root             | D3310 | Endodontic therapy, anterior tooth (excluding final restoration)                                                                         |
| d_root             | D3320 | Endodontic therapy, bicuspid tooth (excluding final restoration)                                                                         |
| d_root             | D3330 | Endodontic therapy, molar (excluding final restoration)                                                                                  |
| d_gumsurg          | D4320 | Provisional splinting - intra                                                                                                            |
| d_gumsurg          | D4321 | Provisional splinting - extracoronal                                                                                                     |
| d_gumsurg          | D4341 | Periodontal scaling and root planing - four or more teeth per quadrant                                                                   |
| d_gumsurg          | D4342 | Periodontal scaling and root planing - one to three teeth per quadrant                                                                   |
| d_gumsurg          | D4355 | Full mouth debridement to enable comprehensive evaluation and diagnosis                                                                  |
| d_perio_recal<br>l | D4910 | Periodontal maintenance                                                                                                                  |
| d_dentures         | D5110 | Complete denture - maxillary                                                                                                             |
| d_dentures         | D5120 | Complete denture - mandibular                                                                                                            |
| d_dentures         | D5130 | Immediate denture - maxillary                                                                                                            |
| d_dentures         | D5140 | Immediate denture - mandibular                                                                                                           |
| d_dentures         | D5211 | Maxillary partial denture - resin base (including any conventional clasps, rests and teeth)                                              |
| d_dentures         | D5212 | Mandibular partial denture - resin base (including any conventional clasps, rests and teeth)                                             |
| d_dentures         | D5213 | Maxillary partial denture - cast metal framework with resin denture bases and teeth)                                                     |
| d_dentures         | D5214 | Mandibular partial denture - cast metal framework with resin denture bases (including any conventional clasps, rests, and teeth)         |
| d_dentures         | D5221 | Immediate maxillary partial denture - resin base (including any conventional clasps, rests and teeth)                                    |
| d_dentures         | D5222 | Immediate mandibular partial denture - resin base (including any conventional clasps, rests and teeth)                                   |
| d_dentures         | D5223 | Immediate maxillary partial denture - cast metal framework with resin denture bases (including any conventional clasps, rests and teeth) |

|            |       |                                                                                                                                                     |
|------------|-------|-----------------------------------------------------------------------------------------------------------------------------------------------------|
| d_dentures | D5224 | Immediate mandibular partial denture - cast metal framework with resin denture bases (including any conventional clasps, rests and teeth)           |
| d_dentures | D5225 | Maxillary partial denture — flexible base (including any clasps, rests, and teeth)                                                                  |
| d_dentures | D5226 | Mandibular partial denture - flexible base (including any clasps, rests, and teeth)                                                                 |
| d_repair   | D5510 | Repair broken complete denture base                                                                                                                 |
| d_repair   | D5520 | Replace missing or broken teeth — complete denture (each tooth)                                                                                     |
| d_repair   | D5610 | Repair resin denture base                                                                                                                           |
| d_repair   | D5630 | repair or replace broken clasp                                                                                                                      |
| d_repair   | D5640 | Replace broken teeth - per tooth                                                                                                                    |
| d_repair   | D5650 | Add tooth to existing partial denture                                                                                                               |
| d_repair   | D5660 | Add clasp to existing partial denture - per tooth                                                                                                   |
| d_repair   | D5710 | Rebase complete maxillary denture                                                                                                                   |
| d_repair   | D5711 | Rebase complete mandibular denture                                                                                                                  |
| d_repair   | D5720 | Rebase maxillary partial denture                                                                                                                    |
| d_repair   | D5721 | Rebase mandibular partial denture                                                                                                                   |
| d_repair   | D5730 | Reline complete maxillary denture(chairside)                                                                                                        |
| d_repair   | D5731 | Reline complete mandibular denture (chairside)                                                                                                      |
| d_repair   | D5740 | Reline maxillary partial                                                                                                                            |
| d_repair   | D5741 | reline mandibular partial                                                                                                                           |
| d_repair   | D5750 | Reline complete maxillary denture (laboratory)                                                                                                      |
| d_repair   | D5751 | Reline complete mandibular denture (laboratory)                                                                                                     |
| d_repair   | D5760 | reline maxillary partial                                                                                                                            |
| d_repair   | D5761 | reline mandibular partial                                                                                                                           |
| d_extract  | D7111 | Extraction, coronal remnants -deciduous tooth                                                                                                       |
| d_extract  | D7140 | Extraction, erupted tooth or exposed root (elevation and/or forceps removal)                                                                        |
| d_extract  | D7210 | Surgical removal of erupted tooth requiring removal of bone and/or sectioning of tooth, and including elevation of mucoperiosteal flap if indicated |
| d_extract  | D7230 | Removal of impacted tooth -partially bony                                                                                                           |
| d_extract  | D7240 | Removal of impacted tooth -completely bony                                                                                                          |
| d_extract  | D7250 | Surgical removal of residual tooth roots (cutting procedure)                                                                                        |
| d_extract  | D7251 | Coronectomy - intentional partial tooth removal                                                                                                     |
| d_oralsurg | D7286 | Incisional biopsy of oral tissue - soft                                                                                                             |
| d_oralsurg | D7310 | Alveoloplasty in conjunction with extractions - four or more teeth or tooth spaces, per quadrant                                                    |
| d_oralsurg | D7970 | Excision of hyperplastic tissue - per arch                                                                                                          |
| d_other    | D9110 | Palliative (emergency) treatment of dental pain - minor procedure                                                                                   |
| d_other    | D9230 | Inhalation of nitrous oxide/analgesia, anxiolysis                                                                                                   |
| d_other    | D9310 | Consultation - diagnostic service provided by dentist or physician other than requesting dentist or physician                                       |
| d_other    | D9910 | Application of desensitizing medicament                                                                                                             |
| d_other    | D9940 | Occlusal guard, by report                                                                                                                           |
| d_other    | D9941 | Fabrication of athletic mouth guard                                                                                                                 |
| d_other    | D9951 | Occlusal adjustment - limited                                                                                                                       |
| d_other    | D9952 | Occlusal adjustment - complete                                                                                                                      |



**Table A5. Costs and revenues from medical-dental integration, per practice per year**

| <b>Parameters</b>                                                              | <b>Cost, year 1<br/>(USD)</b>    | <b>Cost, after<br/>year 1<br/>(USD)</b> | <b>Gross revenue<br/>(USD)</b>   | <b>Net revenue,<br/>year 1<br/>(USD)</b> | <b>Net revenue,<br/>after year 1<br/>(USD)</b> |
|--------------------------------------------------------------------------------|----------------------------------|-----------------------------------------|----------------------------------|------------------------------------------|------------------------------------------------|
| Base case                                                                      | 585,927<br>(585,335,<br>586,519) | 389,514<br>(388,923,<br>390,104)        | 493,830<br>(492,831,<br>494,828) | -92,053<br>(-93,054,<br>-91,052)         | 104,316<br>(103,315,<br>105,316)               |
| <i>Different payer distributions (dental insurance coverage distributions)</i> |                                  |                                         |                                  |                                          |                                                |
| Community<br>health center<br>(18% private,<br>50% public,<br>32% uninsured)   | 586,347<br>(585,763,<br>586,930) | 389,006<br>(388,421,<br>389,590)        | 459,105<br>(458,174,<br>460,035) | -127,238<br>(-128,186,<br>-126,289)      | 70,099<br>(69,136,<br>71,061)                  |
| Primary care<br>provider<br>(50% private,<br>17% public,<br>33% uninsured)     | 585,682<br>(586,268,<br>585,095) | 389,970<br>(389,393,<br>390,546)        | 498,733<br>(497,726,<br>499,740) | -87,319<br>(-88,324,<br>-86,313)         | 108,764<br>(107,744,<br>109,783)               |

**Figure A1. Payment source distribution by insurance type**

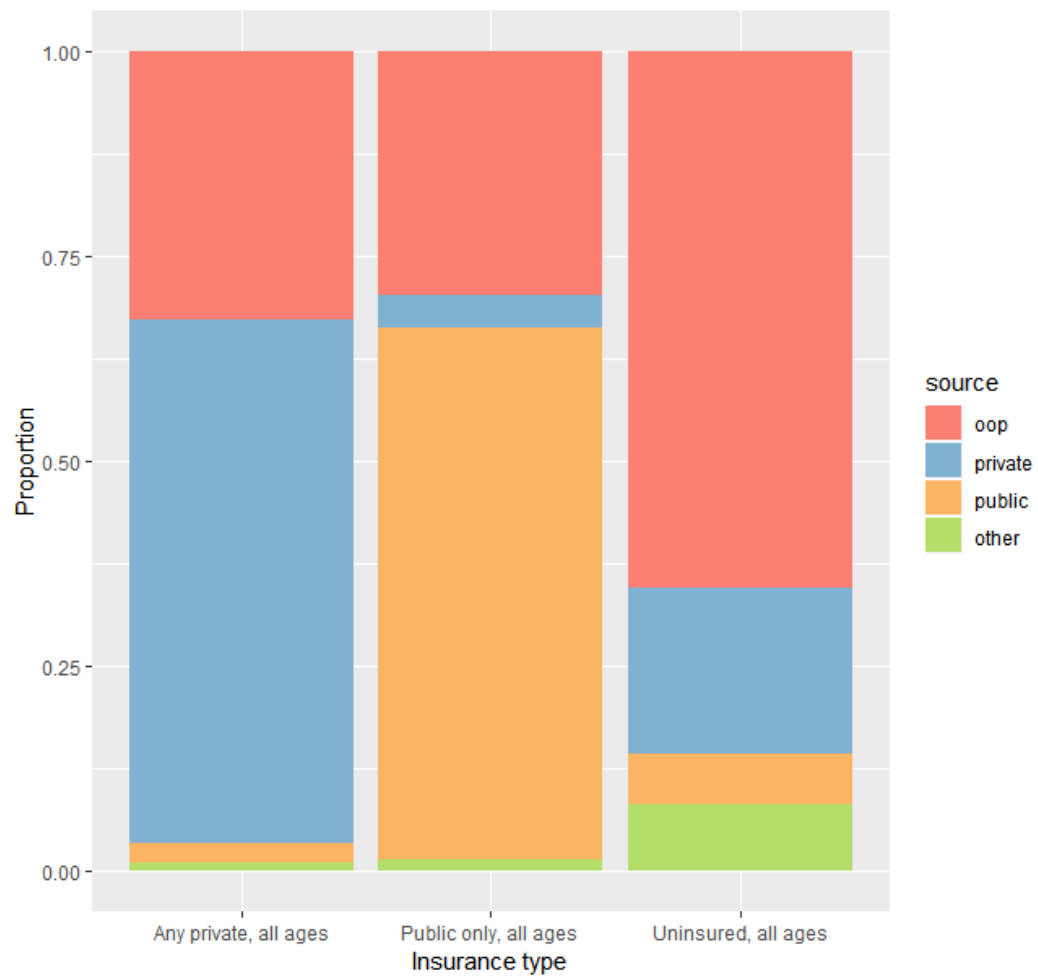

oop: out-of-pocket;

other: Tricare, Veterans Affairs, Other state, Other federal, workers compensation, other unclassified

**Figure A2. Utilization rates by procedure and insurance types**

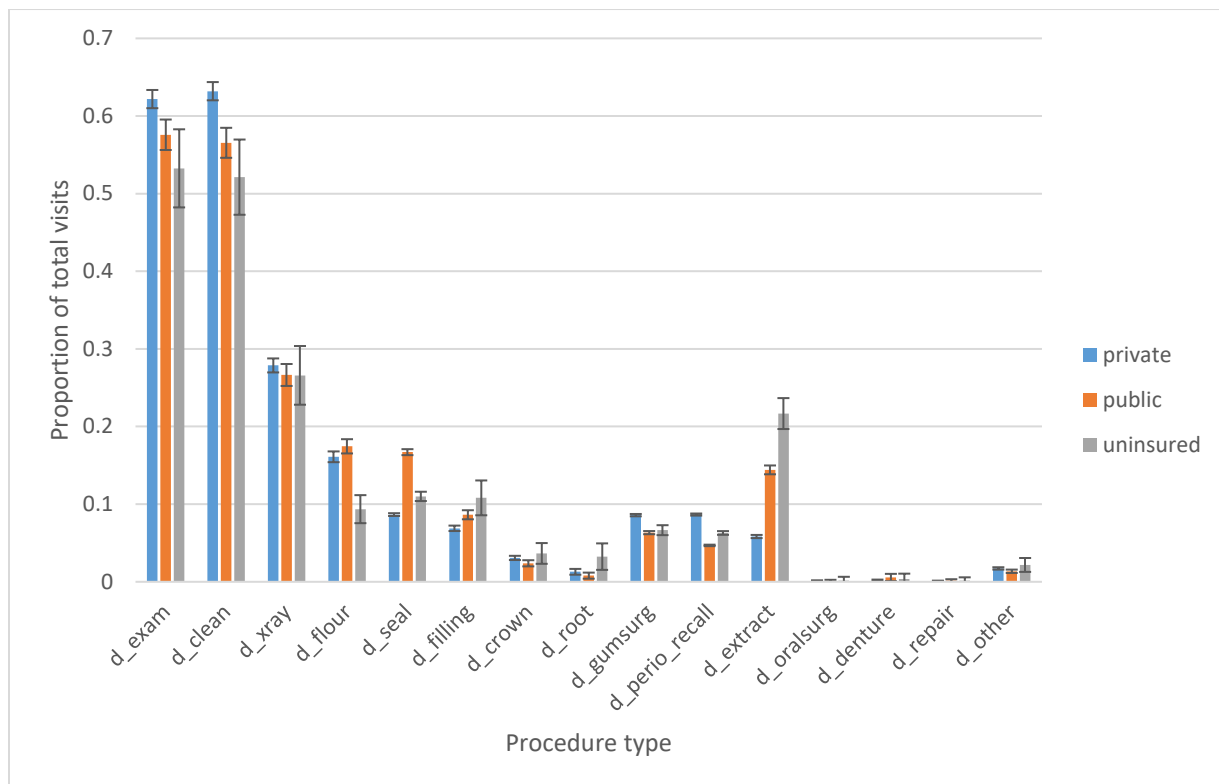

exam: diagnostic; clean: prophylaxis; xray: radiographic image; flour: fluoride; seal: sealant; root: root canal; gumsurg: periodontal scaling, root planning or gum; extract: extraction/ tooth pulled; repair: repair of bridges/dentures or relining
